# Supplementary material
Source: PubMed Central journal article supplement (PMC5444142)
Supplement: AAC.00025-17_zac006176226s1.pdf [file AAC.00025-17_zac006176226s1.pdf]

SUPPLEMENTARY

Supplementary Table 1. Primers utilized for quantitative RT-PCR reaction and sequence amplification for cloning: *bla*<sub>KPC</sub>, housekeeping gene *rpoB*, amplification of putative promoter sequences of Tn4401a, Tn4401b and Tn4401h, P1, P2, intervening sequence and sequencing of vector pRS551.

| Primer Name          | Nucleotide sequence                      |
|----------------------|------------------------------------------|
| RTKPC - F            | 5' <u>GGCCGCCGTGCAATAC</u> 3'            |
| RTKPC – R            | 5' GCCGCCCAACTCCTTCA 3'                  |
| EcoliRPOB-F          | 5' TCCGTATTCCCGATTCAAG 3'                |
| EcoliRPOB-R          | 5' ATTCTGGACGTCAAACACC 3'                |
| F-ISK <sub>pn7</sub> | 5' CTACTGGAATTCAAAATCCAAACCCGAATGATCC 3' |
| R-prom               | 5' CTACTGGGATCCGTTTGAAGGTGGAGCTAGGTG 3'  |
| P1Eco-F              | 5' CTACTGGAATTCGAGCGGCTTGCCGCTCGGTG 3'   |
| P1+IVS Eco-F         | 5' CTACTGGAATTCAGTCGGGGCTTGCCAGGACT 3'   |
| P2 Bam –R            | 5' CTACTGGGATCCATTGGGGCGCGAAGATAGCAC 3'  |
| P2+IVS Bam –R        | 5' CTACTGGGATCCCCTCTCCAGAGGCTGTAACGGC 3' |
| pRS551-R Sequencing  | 5' TAAAACGACGGCCAGTGAAT 3'               |

Supplementary Figure S1. Primer sequences (underlined) used to amplify putative promoter sequences associated with Tn4401a, Tn4401b and Tn4401h isoforms. ISK<sub>pn7</sub> partial nucleotide sequence is demonstrated in purple and partial *bla*<sub>KPC</sub> gene nucleotide sequence is demonstrated in blue.

ISK<sub>pn7</sub>

CAGTGGGCCGACGCGTTTGCCGGCGATACCACCCTGACAGCCGCGATGCTGGATCGGCTGCTGCACCATGCCA  
TATCCTGACCCTGAGCGGCGAAAGCTACCGCTTGAAGGACAAGAGGAAGGCGGGAGTGGTCAGGAAAAATTCC  
AAACCCGAATGATCCAGGTGGGTGAGTATTACTTTGGTGATTCAGGGGTAAAGTGGGTGAGTTTTCAGTTGGTG  
TTGACACCGGCGTACCCTCGGTGCTATCTTCGCGCCCAATGAGCGGCTTGCCGCTCGGTGATAATCCCAGCTGTA  
GCGGCTGATTACATCCGCGGCTACACCTAGCTCCACCTCAAACAAGGAATATCGTTGATGTCAGTGTATCGCC  
GTCTAGTTCTGCTGCTTGTCTCTCATGGCCGCTGGCTGGCTTTTCTGCCACCGCGCTGACCAACCTCGTCGCGGA  
ACCATTGCTAAACTCGAACAGGACTTTGGCGGCTCCATCGGTGTGTACGCGATGGATACCGGCTCAGGCGCAA

*bla*<sub>KPC</sub>
